# Supplementary material
Source: MDPI journal article supplement (https://www.mdpi.com/2073-4352/14/3/270)
Supplement: s1 [file s1]

# Floating Zone Growth of Pure and Pb-Doped Bi-2201 Crystals

Maria Roslova, Bernd Büchner and Andrey Maljuk

## Supplementary Information

**Table S1.** Crystal data and structure refinement for OD23K.

| Refined composition                                                           | $\text{Bi}_{1.902}\text{Sr}_2\text{CuO}_{5.885}$                                      |
|-------------------------------------------------------------------------------|---------------------------------------------------------------------------------------|
| $M_r$                                                                         | 730.48                                                                                |
| Crystal system, space group                                                   | Orthorhombic, <i>Ccc2</i> (37)                                                        |
| Temperature (K)                                                               | 298                                                                                   |
| $a, b, c$ (Å)                                                                 | 5.3947(6), 24.605(3), 5.2786(6)                                                       |
| $V$ (Å <sup>3</sup> )                                                         | 700.68(15)                                                                            |
| $Z$                                                                           | 4                                                                                     |
| Radiation type                                                                | Mo $K\alpha$                                                                          |
| $\mu$ (mm <sup>-1</sup> )                                                     | 65.708                                                                                |
| Crystal size (mm)                                                             | 0.04×0.03×0.01                                                                        |
| Data collection                                                               |                                                                                       |
| Diffractometer                                                                | Bruker D8 VENTURE                                                                     |
| Absorption correction                                                         | Multi-scan                                                                            |
| No. of measured, independent and observed<br>[ $I > 2\sigma(I)$ ] reflections | 6333, 984, 808                                                                        |
| $R_{\text{int}}$                                                              | 0.077                                                                                 |
| $(\sin \theta/\lambda)_{\text{max}}$ (Å <sup>-1</sup> )                       | 0.693                                                                                 |
| Refinement                                                                    |                                                                                       |
| $R[F^2 > 2\sigma(F^2)], wR(F^2), S$                                           | 0.0478, 0.1119, 1.089                                                                 |
| No. of reflections                                                            | 984                                                                                   |
| No. of parameters                                                             | 37                                                                                    |
| No. of restraints                                                             | 1                                                                                     |
|                                                                               | $w = 1/[\sigma^2(F_o^2) + (0.0257P)^2 + 125.5544P]$<br>where $P = (F_o^2 + 2F_c^2)/3$ |
| $\Delta\rho_{\text{max}}, \Delta\rho_{\text{min}}$ (e Å <sup>-3</sup> )       | 3.262, -2.687                                                                         |
| Absolute structure                                                            | Refined as an inversion twin                                                          |
| Absolute structure parameter                                                  | 0.47(6)                                                                               |

**Table S2.** Fractional Atomic Coordinates and Equivalent Isotropic Displacement Parameters (Å<sup>2</sup>×10<sup>3</sup>) for OD23K.  $U_{\text{eq}}$  is defined as 1/3 of the trace of the orthogonalised  $U_{\text{ij}}$  tensor.

| Atom | $x/a$     | $y/b$       | $z/c$      | $U_{\text{eq}}$ | Occ.      |
|------|-----------|-------------|------------|-----------------|-----------|
| Bi1  | 0.2676(1) | 0.43697(4)  | 0.27412(2) | 17.8(3)         | 0.951(11) |
| Sr1  | 0.2466(4) | 0.67736(11) | 0.2540(8)  | 19.4(9)         | 1         |

|     |           |           |          |          |         |
|-----|-----------|-----------|----------|----------|---------|
| Cu1 | 1/4       | 3/4       | 0.757(1) | 16.2(11) | 1       |
| O1  | -0.003(8) | 0.7517(8) | 0.513(6) | 20(4)    | 1       |
| O2  | 0.231(3)  | 0.3544(7) | 0.247(5) | 20       | 0.94(5) |
| O3  | 0.650(4)  | 0.4322(9) | 0.374(4) | 20       | 1       |

**Table S3.** Anisotropic Displacement Parameters ( $\text{\AA}^2 \times 10^3$ ) for OD23K. The Anisotropic displacement factor exponent takes the form:  $-2\pi^2[h^2a^{*2}U_{11}+2hka^*b^*U_{12}+\dots]$ .

| Atom | U <sub>11</sub> | U <sub>22</sub> | U <sub>33</sub> | U <sub>23</sub> | U <sub>13</sub> | U <sub>12</sub> |
|------|-----------------|-----------------|-----------------|-----------------|-----------------|-----------------|
| Bi1  | 15.2(5)         | 22.7(5)         | 15.5(5)         | 4.4(6)          | -4.1(12)        | 0.5(4)          |
| Sr1  | 12.1(11)        | 29.3(13)        | 16.7(19)        | -0.4(16)        | -5(2)           | -2.3(8)         |
| Cu1  | 9.2(18)         | 28(2)           | 11(3)           | 0               | 0               | 0.5(15)         |

**Table S4.** Crystal data and structure refinement for OD3K.

| Refined composition                                                           | Bi <sub>1.88</sub> CuO <sub>5.73</sub> Sr <sub>2</sub>                                |
|-------------------------------------------------------------------------------|---------------------------------------------------------------------------------------|
| $M_r$                                                                         | 722.82                                                                                |
| Crystal system, space group                                                   | Orthorhombic, <i>Ccc2</i> (37)                                                        |
| Temperature (K)                                                               | 298                                                                                   |
| $a, b, c$ ( $\text{\AA}$ )                                                    | 5.3878(4), 24.553(2), 5.2646(4)                                                       |
| $V$ ( $\text{\AA}^3$ )                                                        | 696.43(9)                                                                             |
| $Z$                                                                           | 4                                                                                     |
| Radiation type                                                                | Mo $K\alpha$                                                                          |
| $\mu$ ( $\text{mm}^{-1}$ )                                                    | 65.477                                                                                |
| Crystal size (mm)                                                             | 0.05×0.03×0.01                                                                        |
| <b>Data collection</b>                                                        |                                                                                       |
| Diffractometer                                                                | Bruker D8 VENTURE                                                                     |
| Absorption correction                                                         | Multi-scan                                                                            |
| No. of measured, independent and observed<br>[ $I > 2\sigma(I)$ ] reflections | 12508, 1070, 855                                                                      |
| $R_{\text{int}}$                                                              | 0.1170                                                                                |
| $(\sin \theta/\lambda)_{\text{max}}$ ( $\text{\AA}^{-1}$ )                    | 0.693                                                                                 |
| <b>Refinement</b>                                                             |                                                                                       |
| $R[F^2 > 2\sigma(F^2)], wR(F^2), S$                                           | 0.0852, 0.1731, 1.162                                                                 |
| No. of reflections                                                            | 1070                                                                                  |
| No. of parameters                                                             | 41                                                                                    |
| No. of restraints                                                             | 1                                                                                     |
|                                                                               | $w = 1/[\sigma^2(F_o^2) + (0.0533P)^2 + 201.8843P]$<br>where $P = (F_o^2 + 2F_c^2)/3$ |
| $\Delta\rho_{\text{max}}, \Delta\rho_{\text{min}}$ ( $\text{e \AA}^{-3}$ )    | 6.58, -2.57                                                                           |
| Absolute structure                                                            | Refined as an inversion twin                                                          |
| Absolute structure parameter                                                  | 0.40(11)                                                                              |

**Table S5.** Fractional Atomic Coordinates and Equivalent Isotropic Displacement Parameters ( $\text{\AA}^2 \times 10^3$ ) for OD3K.  $U_{eq}$  is defined as 1/3 of the trace of the orthogonalised  $U_{ij}$  tensor.

| Atom | $x/a$      | $y/b$        | $z/c$       | $U_{eq}$ | Occ.     |
|------|------------|--------------|-------------|----------|----------|
| Bi1A | 0.2672(2)  | 0.43701(7)   | 0.2747.5(2) | 25.4(5)  | 0.904(1) |
| Bi1B | 0.2630(70) | 0.4070(20)   | 0.2600(200) | 25(4)    | 0.034(1) |
| Sr1  | 0.2473(6)  | 0.6772.5(18) | 0.2570(20)  | 39.3(17) | 1        |
| Cu1  | 1/4        | 3/4          | 0.7590(50)  | 40(2)    | 1        |
| O1   | 0.0030(80) | 0.7521(11)   | 0.4930(70)  | 25(6)    | 0.87(2)  |
| O2   | 0.2270(50) | 0.3539(11)   | 0.2480(90)  | 25       | 1        |
| O3   | 0.6480(60) | 0.4321(13)   | 0.3850(60)  | 25       | 1        |

**Table S6.** Anisotropic Displacement Parameters ( $\text{\AA}^2 \times 10^3$ ) for OD3K. The Anisotropic displacement factor exponent takes the form:  $-2\pi^2[h^2a^{*2}U_{11}+2hka^*b^*U_{12}+\dots]$ .

| Atom | $U_{11}$ | $U_{22}$ | $U_{33}$ | $U_{23}$ | $U_{13}$ | $U_{12}$ |
|------|----------|----------|----------|----------|----------|----------|
| Bi1A | 18.2(7)  | 21.4(9)  | 36.5(8)  | 5.8(13)  | -8.1(14) | 0.8(6)   |
| Bi1B | 18(11)   | 21.4(7)  | 36.5(9)  | 5.8(8)   | -8.1(13) | 0.8(14)  |
| Sr1  | 14.8(16) | 34.6(19) | 69(5)    | -4(4)    | -17(4)   | -3.4(13) |
| Cu1  | 13(3)    | 35(3)    | 71(7)    | 0        | 0        | -1(2)    |
